# Supplementary material for: Oxysterol 7-α Hydroxylase (CYP7B1) Attenuates Metabolic-Associated Fatty Liver Disease in Mice at Thermoneutrality
Source: MDPI journal article supplement (doi:10.3390/cells10102656), 2021-10-05
Supplement: s1 [file s1]

Figure S1

A.

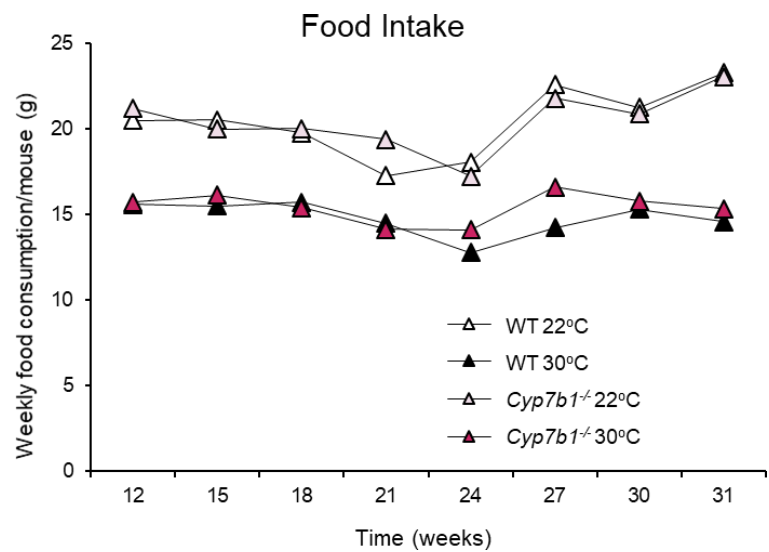

B.

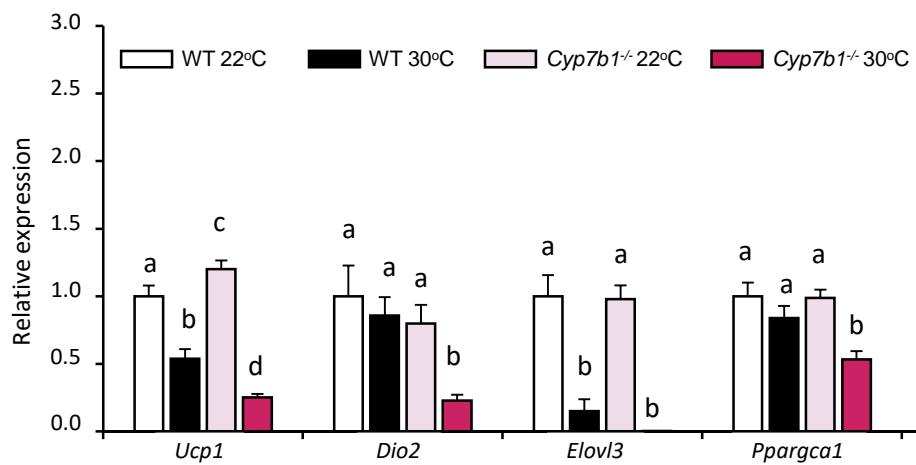

**Figure S1.** (A) *Cyp7b1*<sup>-/-</sup> and WT littermates housed under 22 °C or 30 °C were fed a CD-HFD for 8 months. (A) Food intake (WT 22 °C: n= 11; WT 30 °C: n=9; *Cyp7b1*<sup>-/-</sup> 22 °C: n=16; *Cyp7b1*<sup>-/-</sup> 30 °C: n=13). (B) Relative expression of thermogenesis-related genes in brown adipose tissue. Data are shown as mean values  $\pm$  SEM. n=8 per group, different letters indicate significant differences between groups (p<0.05) determined by two-way ANOVA.

Figure S2

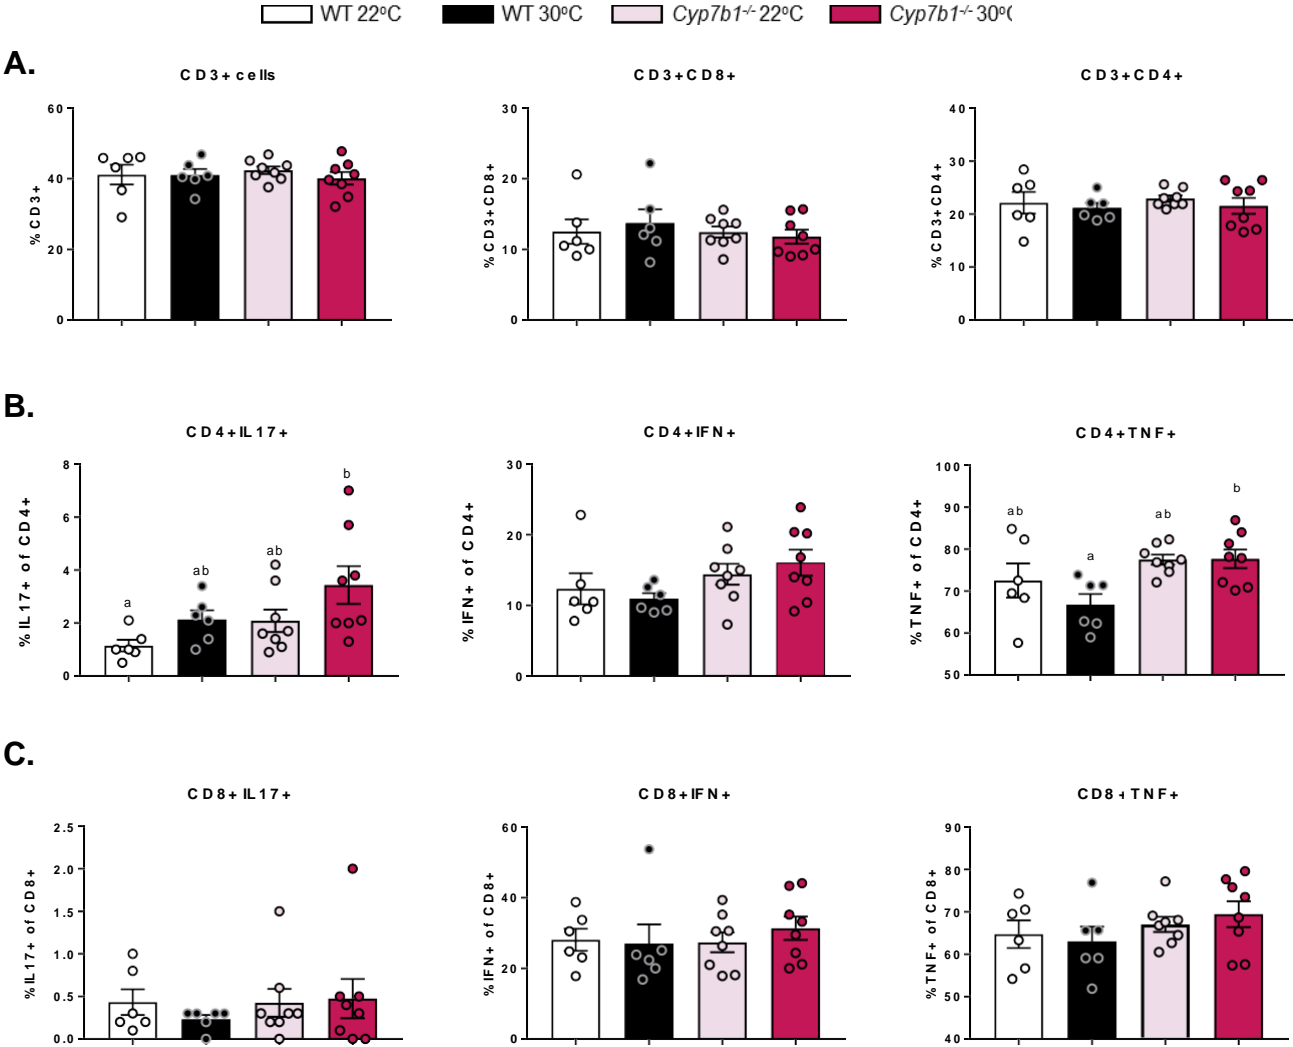

**Figure S2.** CYP7B1-deficiency affects hepatic cytokine-producing T cell populations during the onset of MAFLD in thermoneutral conditions. FACS analysis of (A) all CD3+ lymphocytes, as well as IL17-, IFN-, TNF-producing (B) CD3+CD8+ and (C) CD3+CD4+ cells in livers of *Cyp7b1*<sup>-/-</sup> and wild type littermates housed under 22°C or 30°C, all fed a CD-HFD for 3 weeks. Data are shown as mean values  $\pm$  SEM. n=6-8/group. Different letters indicate significant differences between groups ( $p < 0.05$ ) determined by two-way ANOVA.

**Figure S3**

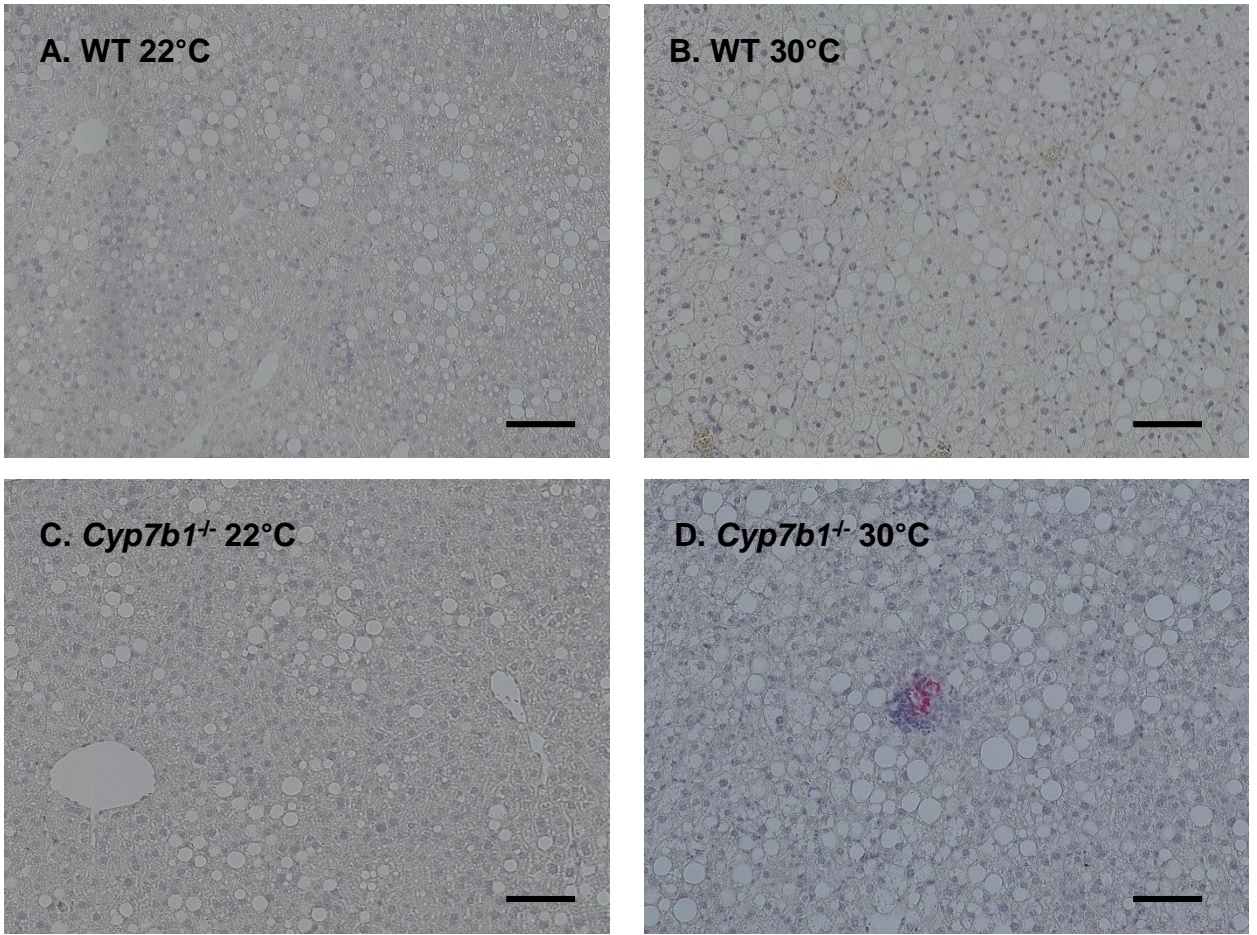

**Figure S3.** Immune cell infiltration in CYP7B1-deficient mice housed at thermoneutrality. *Cyp7b1*<sup>-/-</sup> and WT littermates housed under 22 °C or 30 °C were fed a CD-HFD for 8 months. Representative images of CD3 immunostaining in livers of (A) WT 22 °C, (B) WT 30 °C, (C) *Cyp7b1*<sup>-/-</sup> 22 °C, and (D) *Cyp7b1*<sup>-/-</sup> 30 °C. In two out of eight liver sections from WT 22 °C, in two out of eight liver sections from WT 30 °C, one out of eight liver sections from *Cyp7b1*<sup>-/-</sup> 22 °C, and four out of eight liver sections from *Cyp7b1*<sup>-/-</sup> 30 °C CD3 could be detected by immunohistochemistry. Bar 100 μm.
